# Supplementary material for: A Membrane Reactor with Microchannels for Carbon Dioxide Reduction in Extraterrestrial Space
Source: MDPI journal article supplement (doi:10.3390/catal12010003), 2021-12-21
Supplement: s1 [file s1]

# A Membrane Reactor with Microchannels for Carbon Dioxide Reduction in Extraterrestrial Space

Deqiang Feng, Wenjun Jiang \*, Ce Zhang, Long Li, Botao Hu, Jian Song, and Wei Yao \*

## 1. Evaluation of FE

The FE for gas products was calculated as follows:

$$FE = \frac{Q_{gas}}{Q} = \frac{v \times y \times \alpha \times F \times P_0}{I \times R \times T_0} \quad (1)$$

where FE is the Faradaic efficiency of the gas product; Q is the total number of the charge consumed during the reaction;  $Q_{gas}$  is the charge corresponding to gas products;  $v$  represents the flow rate of  $CO_2$ ;  $y$  is the measured concentration of the gas product;  $\alpha$  is the number of electrons required to form a molecule of the gas product;  $F$  is the Faraday constant ( $96485 \text{ C mol}^{-1}$ );  $P_0$  is the standard atmosphere;  $R$  is the universal gas constant ( $8.314 \text{ J Mol}^{-1} \text{ K}^{-1}$ );  $T_0$  is the absolute temperature;  $I$  is the total current.

## 2. Evaluation of SPCE

The single-pass carbon efficiency (SPCE) of  $CO_2$  in each product was calculated as follows:

$$SPCE = \frac{\frac{j_x \times 60 \text{ (second)}}{\alpha \times F}}{\frac{v(L/min) \times 1(min)}{22.4(L/mol)}} \quad (2)$$

where  $j_x$  is the partial current density of specific products from  $CO_2$  reduction,  $\alpha$  is the electron transfer for every product molecule, and  $F$  is the Faradaic constant.

## 3. Evaluation of EE

The energy efficiency (EE) for  $C_2H_4$  was calculated as follows:

$$EE_{C_2H_4} = \frac{(1.23 - E_{C_2H_4}) \times FE_{C_2H_4}}{E_{app}} \quad (3)$$

where  $E_{C_2H_4}$  is the thermodynamic potential (vs RHE) for  $CO_2$ RR to  $C_2H_4$  species, which is 0.08 V for  $C_2H_4$ .  $E_{app}$  is the cell voltage in a two-electrode setup.

**Citation:** Feng, D.; Jiang, W.; Zhang, C.; Li, L.; Hu, B.; Song, J.; Yao, W. A Membrane Reactor with Microchannels for Carbon Dioxide Reduction in Extraterrestrial Space. *Catalysts* **2022**, *12*, 3. <https://doi.org/10.3390/catal12010003>

Academic Editors: Shangqian Zhu, Qinglan Zhao and Yao Yao

Received: 19 November 2021

Accepted: 19 December 2021

Published: 21 December 2021

**Publisher's Note:** MDPI stays neutral with regard to jurisdictional claims in published maps and institutional affiliations.

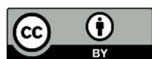

**Copyright:** © 2021 by the authors. Licensee MDPI, Basel, Switzerland. This article is an open access article distributed under the terms and conditions of the Creative Commons Attribution (CC BY) license (<https://creativecommons.org/licenses/by/4.0/>).

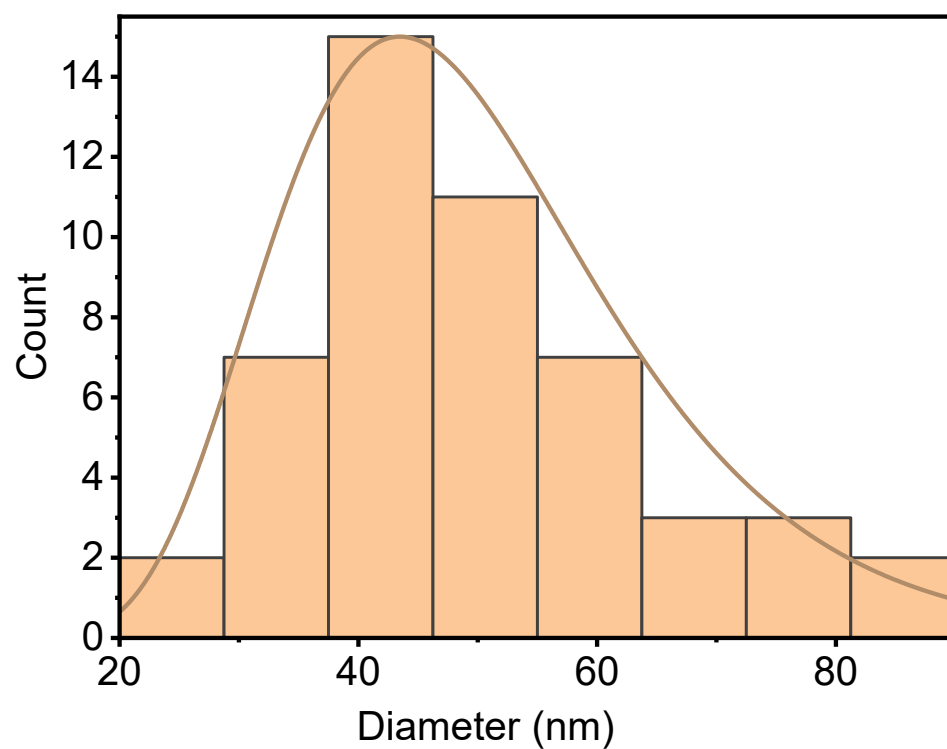

Figure S1. Diameter distributions of CuNWs.

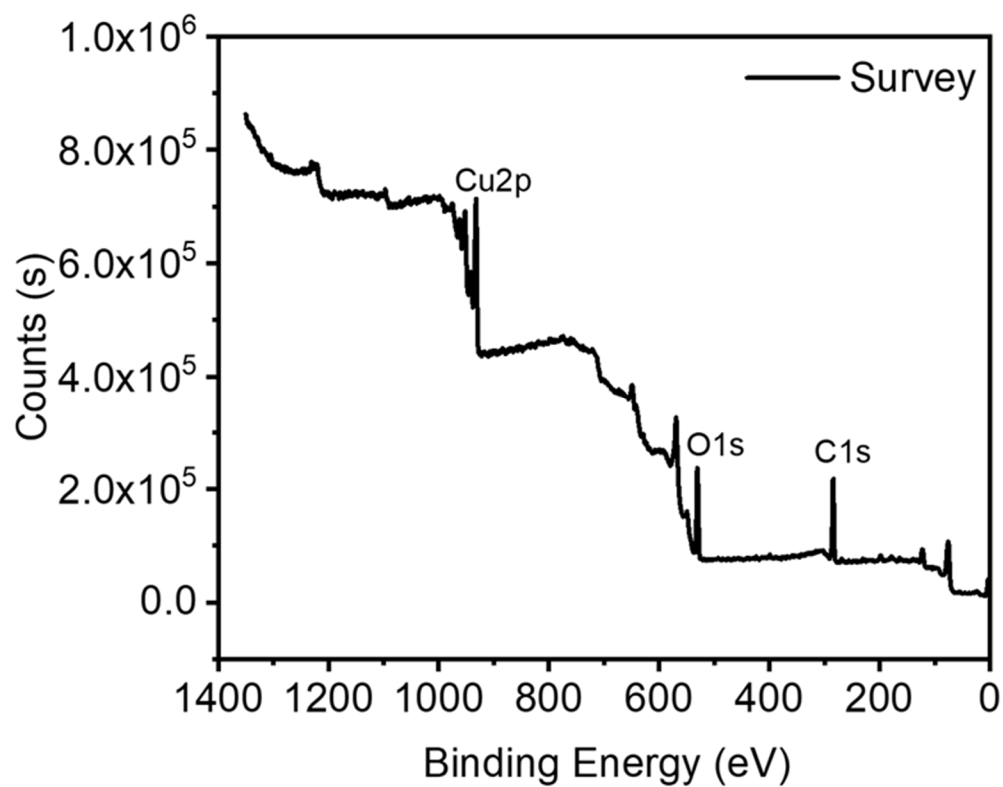

Figure S2. XPS of survey spectra of CuNWs.

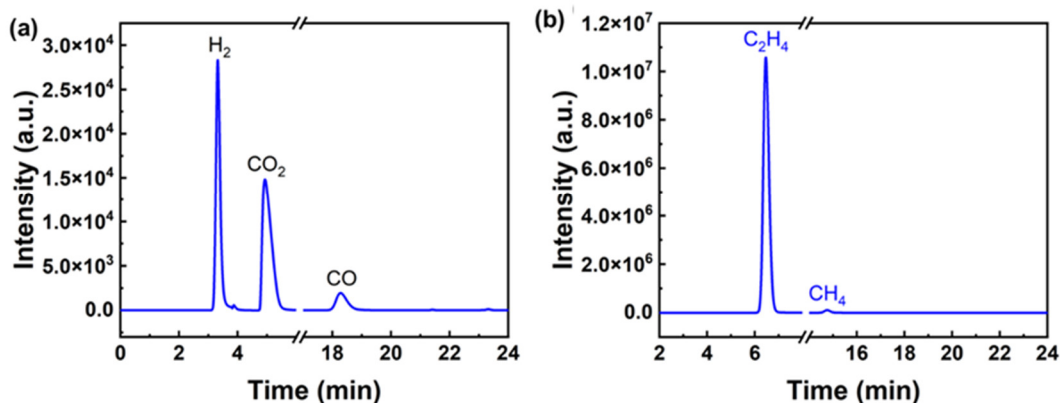

**Figure S3.** Typical (a) TCD and (b) FID chromatograms of cathodic gas products measured under the condition of  $CO_2$  gas flow rate of 10 sccm, anolyte flow rate of 10 sccm, the voltage of 4.2 V, with the anion exchange membrane using Sustainion X37-50 Grade 60, and the channel type of series microchannel structure.

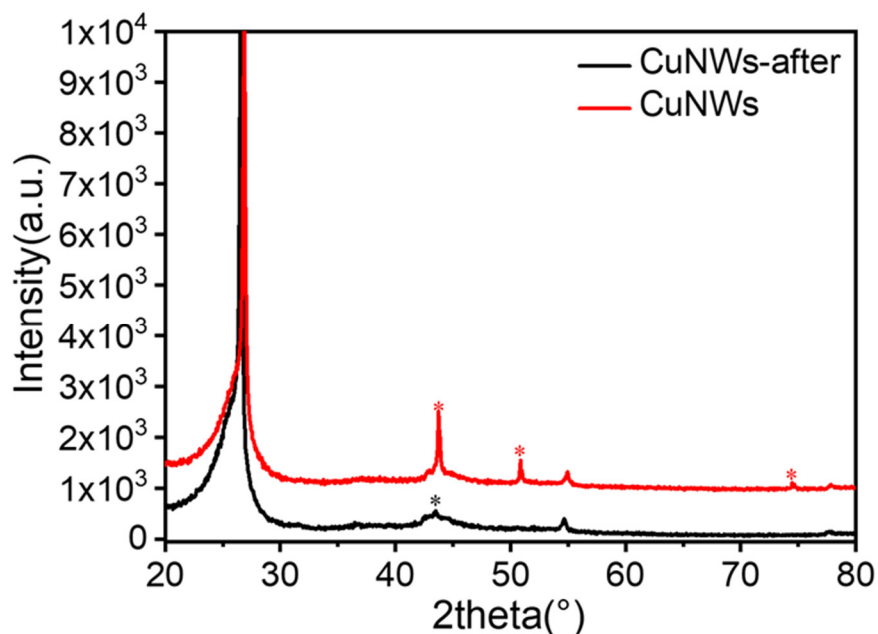

**Figure S4.** XRD patterns of CuNWs before and after reaction.

**Table S1.** The single-pass carbon efficiency (SPCE) of  $CO_2$  in each product at 4.2 V.

|          | SPCE- $CO$ (%) | SPCE- $CH_4$ (%) | SPCE- $C_2H_4$ (%) | SPCE-gas (%) |
|----------|----------------|------------------|--------------------|--------------|
| Grade 60 | 6.78           | 0.19             | 4.64               | 11.61        |
| Grade T  | 7.20           | 0.19             | 4.14               | 11.54        |
| FAA-3-30 | 5.34           | 0.17             | 3.17               | 8.68         |

**Table S2.** The energy efficiency (EE) of  $CO_2$  in  $C_2H_4$  at 4.2 V.

| Membrane              | Grade 60 | Grade T | FAA-3-30 |
|-----------------------|----------|---------|----------|
| Energy Efficiency (%) | 19.9     | 17.8    | 13.4     |

**Table S3.** Concentrations of Cu and Ir in the anodic solution before and after the reaction.

| Reaction time (min) | Cu (%) | Ir (%) |
|---------------------|--------|--------|
| 0                   | 0      | 0      |
| 30                  | 3523.2 | 1422.7 |
| 60                  | 3985.5 | 3255.5 |
